# Supplementary material for: A polyvalent multiepitope protein cross-protects against Vibrio cholerae infection in rabbit colonization and passive protection models
Source: PubMed Central journal article supplement — Proc Natl Acad Sci U S A. 2022 Dec 5;119(50):e2202938119. doi: 10.1073/pnas.2202938119 (PMC9897427; doi:10.1073/pnas.2202938119), 2022-12-05
Supplement: pnas.2202938119.sapp.pdf [file pnas.2202938119.sapp.pdf]

1 **Supplemental Data**

2 **Figure S1.** Antigen-specific IgG titers (in log<sub>10</sub>) from the serum samples of the mice (n = 8)  
3 intramuscularly immunized with PBS control (+), 10 µg cholera MEFA protein (▽), or  
4 orogastrically immunized with Shanchol (100 µl, of the 1.5 ml adult human dose; ○), one primary  
5 and two boosters at a 3-wk interval, comparatively to the IgG titers from the mice intramuscularly  
6 immunized with 25 µg cholera MEFA protein at 2-wk interval (●). Mouse serum samples collected  
7 two weeks after the second booster were titrated for antigen-specific IgG responses in ELISAs,  
8 with two replicates. Mice IM immunized with 10 or 25 µg cholera MEFA protein developed the  
9 same levels of IgG response to each targeted antigen; these IgG titers were significantly greater  
10 than those from the mice orogastrically immunized with Shanchol except for TcpA (O1 El Tor and  
11 O139), based on Two-way ANOVA with the Bonferroni post hoc test. No anti-LPS response was  
12 detected. No antigen-specific IgG antibody responses were detected in the control mice.

13

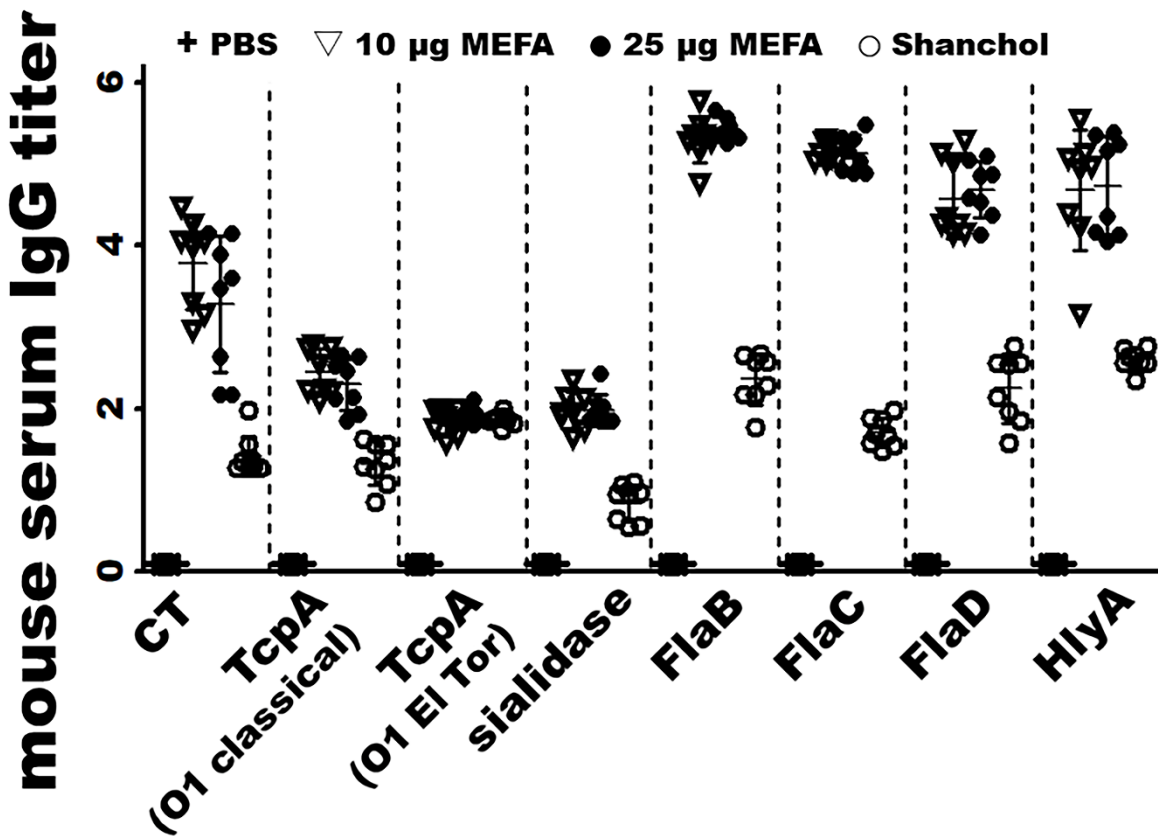

14

15

16 **Figure S2.** Microscopic images to show antibody inhibition activity against the motility of *Vibrio*  
17 *cholerae* O1 El Tor N16961, O1 classical O395, O139 Bengal strain, and non-O1/non-O139 El  
18 Tor 34-D 23 strain. Bacteria (10  $\mu$ l, OD = 0.1), after incubation with PBS (no sera), the sera of the  
19 mice IM immunized with PBS (control sera), or the sera of the mice IM immunized with cholera  
20 MEFA protein and adjuvant dmLT (MEFA/dmLT sera), were observed under a Zeiss Axiovert  
21 200M microscope with the Apotome Structured Illumination Optical Sectioning System. Images  
22 were recorded using AxioCam 506 using a high-resolution black and white camera.

23

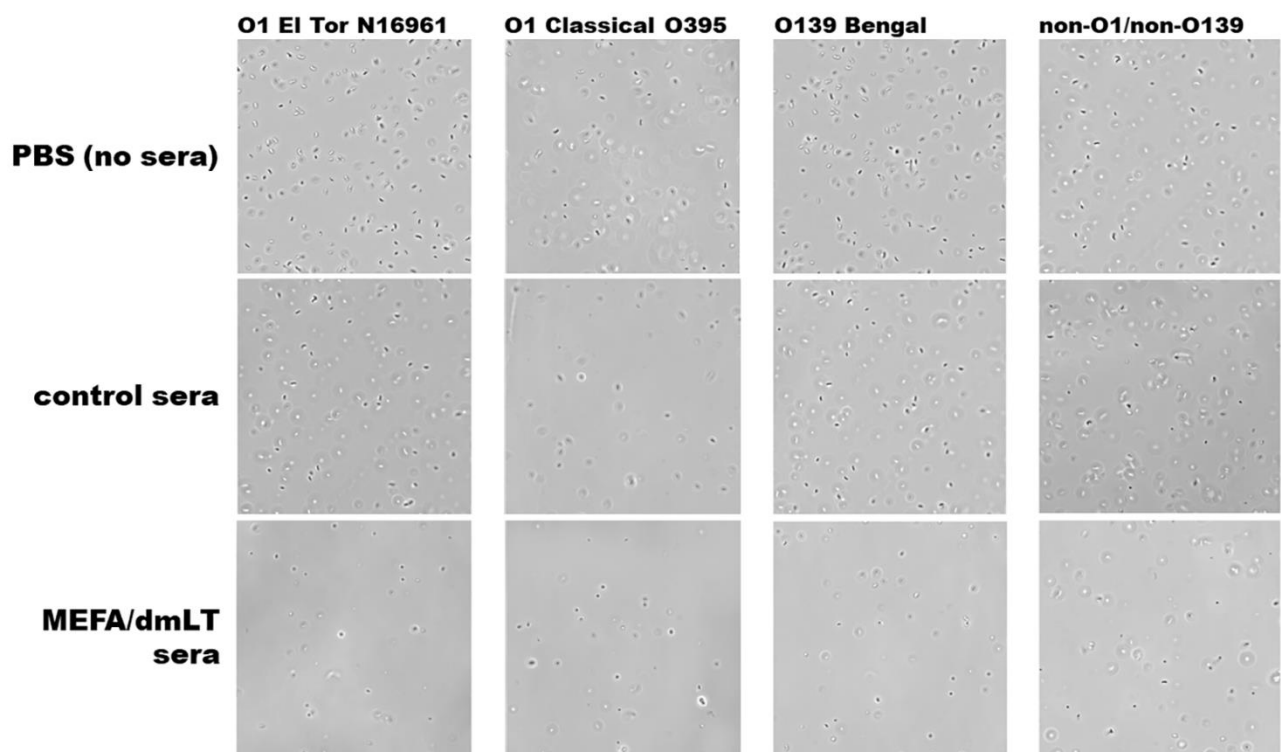

24

25

26

27

28

29 **Figure S3.** Rabbit IgA responses (OD<sub>650</sub> readings in ELISA) from the cecum content supernatants  
30 of the adult rabbits (n=2, 5 replicates) IM immunized with 100 µg cholera MEFA protein (grey  
31 box), IM immunized with 100 µl PBS (white box), or orogastrically inoculated with Vaxchora  
32 (live attenuated *V. cholerae* CVD 103-HgR; 5x10<sup>9</sup> CFUs in 1 ml PBS; black box); one primary  
33 and one booster at a two-week interval. Data indicated that IM immunization with cholera MEFA  
34 protein or orogastric inoculation of a live whole-cell cholera vaccine induced antigen-specific IgA  
35 responses in adult rabbits. \*\* and \*\*\* indicate a p-value of <0.01 and <0.001 respectively, based  
36 on Two-way ANOVA with the Bonferroni post hoc test.

37

38

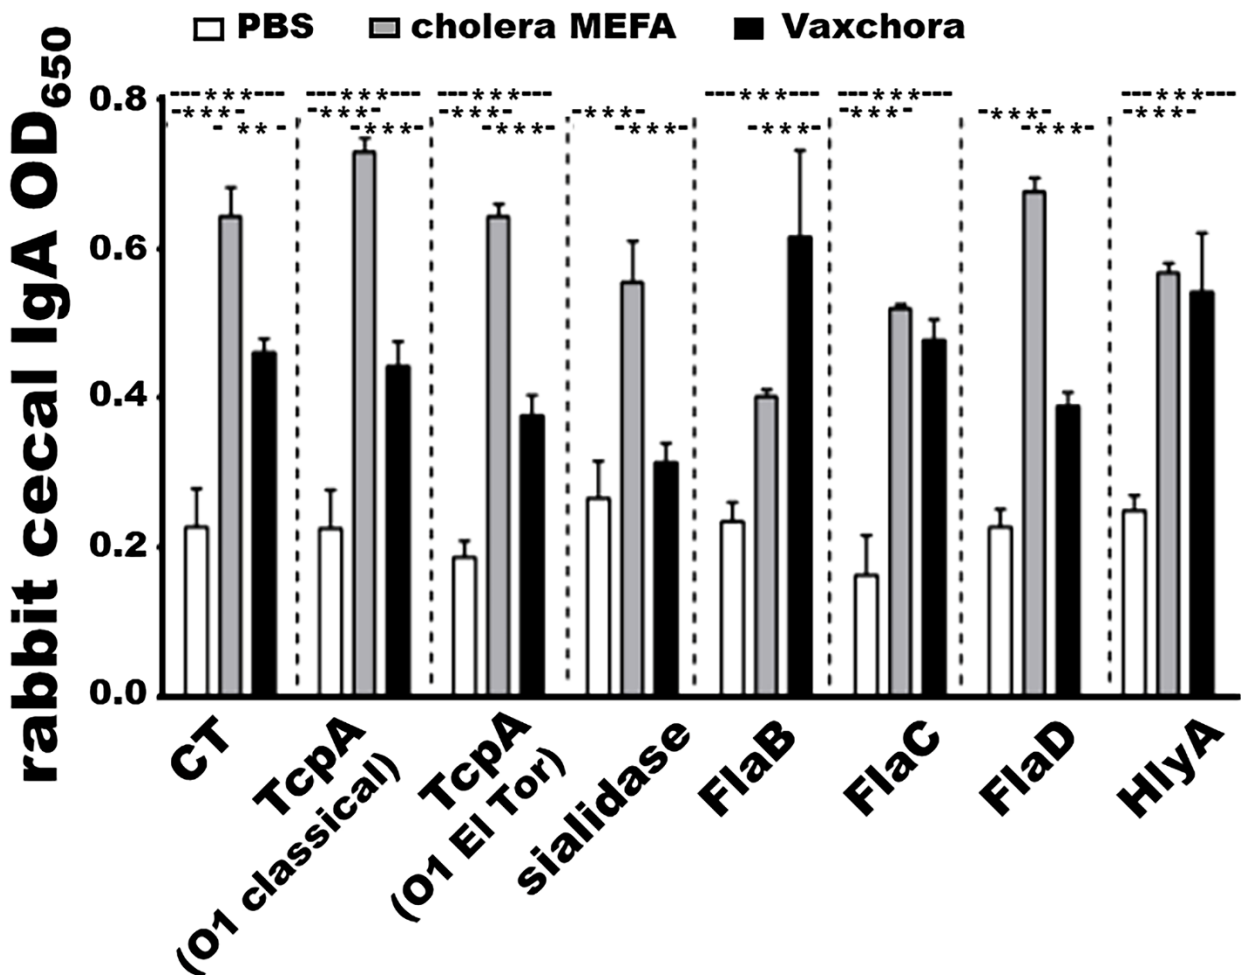

39

40



42 **Figure S4.** *Vibrio cholerae* O1 El Tor N16961 CFUs from the distal ileum segment of the adult  
43 rabbits (n = 2) after orogastric challenge with *V.cholerae* O1 El Tor N16961 ( $10^{10}$  CFUs, in 1ml  
44 PBS), with five replicates for each treatment. These rabbits were first IM immunized with 100  $\mu$ g  
45 cholera MEFA protein (white box) or 100  $\mu$ l PBS (black box), or orogastric immunization with  
46 Vaxchora ( $5 \times 10^9$  CFUs in 1 ml PBS; grey box), one primary and one booster, at the interval of  
47 two weeks. Data indicated that IM immunization of cholera MEFA protein or orogastric inoculation  
48 of a live cholera vaccine protected *Vibrio cholerae* colonization of small intestines in rabbits. \*\*  
49 indicates a p-value of <0.01, based on One-way ANOVA with Turkey's test.

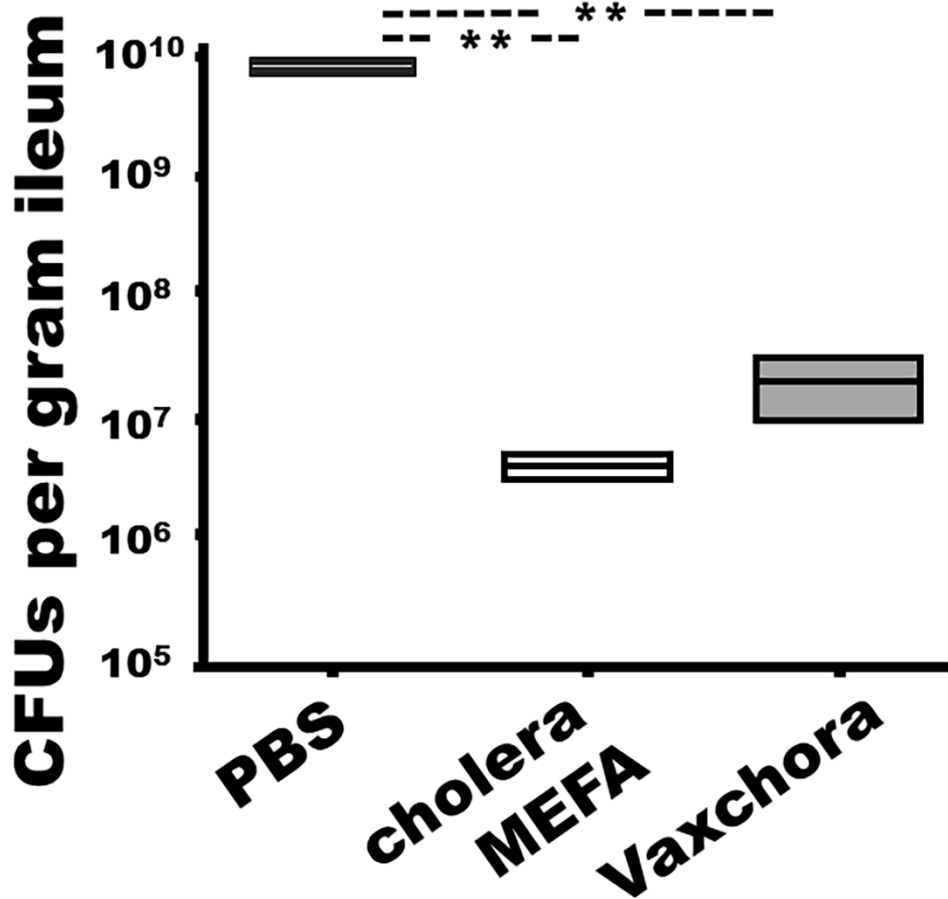

70

71 **Movie S1.** Microscopic video clips to show antibody inhibition activity against motility of *Vibrio*  
72 *cholerae* O1 El Tor N16961. Bacteria (10  $\mu$ l, OD = 0.1), after incubation with PBS (no sera), or  
73 the sera of the mice IM immunized with PBS (control sera) or the cholera MEFA protein and  
74 adjuvant dmLT (MEFA/dmLT sera), were observed under a Zeiss Axiovert 200M microscope  
75 with the Apotome Structured Illumination Optical Sectioning System. Video was recorded with  
76 AxioCam 506 using a high-resolution black and white camera.

77

78 **Table S1.** A list of *Vibrio cholerae* strains and recombinant *E. coli* strains used in this study. *V.*  
79 *cholerae* serogroup strains acquired from BEI Resources (Biodefense and Emerging Infections  
80 Research Resources Repository) were used as DNA templates for virulence gene cloning, *in vitro*  
81 antibody function assays, and rabbit challenge studies. Recombinant virulence factor proteins  
82 expressed by *E. coli* were used as ELISA coating antigens for antibody titration.  
83

| Strains                               | Relevant properties                              | Sources                  |
|---------------------------------------|--------------------------------------------------|--------------------------|
| <i>Vibrio cholerae</i> N16961         | O1, Inaba, El Tor                                | BEI NR-147 (ATCC 39315)  |
| <i>Vibrio cholerae</i> O395           | O1, Ogawa, Classical                             | BEI NR-9906 (ATCC 39541) |
| <i>Vibrio cholerae</i> MO45           | O139 (Bengal)                                    | BEI NR-144 (ATCC 51394)  |
| <i>Vibrio cholerae</i> El Tor 34-D 23 | O3 (non-O1/non-O139)                             | BEI NR-150 (ATCC 14731)  |
| 9746                                  | ‘cholera MEFA’ in pUC57, DH5 $\alpha$            | this study               |
| 9747                                  | ‘cholera MEFA’ in pET28 $\alpha$ , DH5 $\alpha$  | this study               |
| 9748                                  | ‘cholera MEFA’ in pET28 $\alpha$ , BL21(DE3)     | this study               |
| 9764                                  | ‘HlyA’ in pET28 $\alpha$ , BL21(DE3)             | this study               |
| 9771                                  | ‘TcpA (El Tor)’ in pET28 $\alpha$ , BL21(DE3)    | this study               |
| 9779                                  | ‘FlaC’ in pET28 $\alpha$ , BL21(DE3)             | this study               |
| 9781                                  | ‘FlaD’ in pET28 $\alpha$ , BL21(DE3)             | this study               |
| 9808                                  | ‘TcpA (Classical)’ in pET28 $\alpha$ , BL21(DE3) | this study               |

|      |                                                  |            |
|------|--------------------------------------------------|------------|
| 9863 | 'FlaB' in pET28 $\alpha$ , BL21(DE3)             | this study |
| 9866 | 'NanH (sialidase)' in pET28 $\alpha$ , BL21(DE3) | this study |

---

84

85



86 **Table S2**, PCR primers used in this study to amplify *V. cholerae* genes *tcpA* (O1 El Tor and  
 87 Classical), *flaB*, *flaC*, *flaD*, hemolysin A (*hlyA*), and sialidase (*nanH*).

| primers | Nucleotide sequence (5' – 3')                                            | PCR amplified region                           |
|---------|--------------------------------------------------------------------------|------------------------------------------------|
| TcpA-1  | CCCATGGGCATGACATTACTCGAAGTAATCATTG<br>TCACGGCCGTTAACTGTTACCAAAAGCTACTGTG | O1 El Tor and O139 <i>tcpA</i><br>subunit gene |
| TcpA-2  | CCGCCATGGATGCAATTATTAACAGC<br>TCACGGCCGTTAACTGTTACCAAAAGCTACTG           | O1 Classical <i>tcpA</i> subunit gene          |
| Fla B   | CTAGCTAGCATGGCAATTAATGTAAACACG<br>TCACGGCCGTTATTATCCCAATAAGCTCAGAGCT     | flagellin B subunit gene                       |
| Fla C   | CTAGCTAGCATG GCGGTGAATGTAAACACC<br>TCACGGCCGCTAGCCTAGAAGAGCCAGTGC        | flagellin C subunit gene                       |
| Fla D   | CTAGCTAGCATGGCAGTGAATGTAAATAC<br>TCACGGCCGTTATTAACCAACAGGCTGAGTG         | flagellin D subunit gene                       |
| Nan H   | CGGAATTCCGATGGCAACGGGTGACTGAGTT<br>TCACGGCCGTTATTAGGTATCCCAAGTTATACC     | sialidase enzyme                               |
| HlyA    | CCGCCATGGATGCCAAAACCTCAATCG<br>TCACGGCCGTTATCGACAGGAAAGGT                | hemolysin gene                                 |

88

89

90
